# Supplementary material for: Different coexistence patterns between apex carnivores and mesocarnivores based on temporal, spatial, and dietary niche partitioning analysis in Qilian Mountain National Park, China
Source: eLife. 2024 Sep 11;13:RP90559. doi: 10.7554/eLife.90559 (PMC11390114; doi:10.7554/eLife.90559)
Supplement: Table 1—source data 1. [file elife-90559-table1-data1.xlsx]

## Sheet: Wolf
	V1	V2	V3	V4	V5	V6
X0	0	0	0	0	NA	NA
X1	0	0	0	0	NA	NA
X2	0	0	0	0	NA	NA
X3	0	0	0	0	0	NA
X4	0	0	0	NA	NA	NA
X5	0	0	0	NA	NA	NA
X6	0	0	0	NA	NA	NA
X7	0	0	0	NA	NA	NA
X8	0	0	0	NA	NA	NA
X9	0	0	0	NA	NA	NA
X10	0	0	0	NA	NA	NA
X11	0	1	0	NA	NA	NA
X12	0	0	0	NA	NA	NA
X13	0	0	0	NA	NA	NA
X14	0	0	0	NA	NA	NA
X15	0	0	0	NA	NA	NA
X16	0	0	0	0	NA	NA
X17	0	0	0	NA	NA	NA
X18	0	0	0	NA	NA	NA
X19	0	0	0	NA	NA	NA
X20	0	0	0	NA	NA	NA
X21	1	0	0	NA	NA	NA
X22	0	0	0	NA	NA	NA
X23	0	0	NA	NA	NA	NA
X24	NA	NA	NA	NA	NA	NA
X25	0	0	0	NA	NA	NA
X26	0	0	0	NA	NA	NA
X27	0	0	NA	NA	NA	NA
X28	0	0	NA	NA	NA	NA
X29	0	0	0	NA	NA	NA
X30	0	0	0	NA	NA	NA
X31	0	0	0	NA	NA	NA
X32	0	0	0	NA	NA	NA
X33	0	0	0	NA	NA	NA
X34	0	0	0	NA	NA	NA
X35	0	0	0	NA	NA	NA
X36	0	0	0	NA	NA	NA
X37	1	1	0	NA	NA	NA
X38	0	0	0	NA	NA	NA
X39	0	0	0	NA	NA	NA
X40	0	0	0	NA	NA	NA
X41	0	0	0	NA	NA	NA
X42	NA	NA	NA	NA	NA	NA
X43	0	0	0	NA	NA	NA
X44	0	NA	NA	NA	NA	NA
X45	0	0	0	NA	NA	NA
X46	0	0	0	NA	NA	NA
X47	0	0	0	NA	NA	NA
X48	0	0	0	NA	NA	NA
X49	0	0	NA	NA	NA	NA
X50	0	0	NA	NA	NA	NA
X51	0	0	NA	NA	NA	NA
X52	0	0	0	NA	NA	NA
X53	0	NA	NA	NA	NA	NA
X54	0	0	0	NA	NA	NA
X55	0	0	0	NA	NA	NA
X56	NA	NA	NA	NA	NA	NA
X57	0	0	NA	NA	NA	NA
X58	NA	NA	NA	NA	NA	NA
X59	0	0	0	NA	NA	NA
X60	0	0	0	NA	NA	NA
X61	NA	NA	NA	NA	NA	NA
X62	0	0	NA	NA	NA	NA
X63	0	0	0	NA	NA	NA
X64	0	0	0	NA	NA	NA
X65	0	0	0	NA	NA	NA
X66	0	0	0	NA	NA	NA
X67	0	0	0	NA	NA	NA
X68	0	0	0	NA	NA	NA
X69	0	0	0	NA	NA	NA
X70	0	0	0	0	0	0
X71	0	0	0	NA	NA	NA
X72	0	0	0	0	0	NA
X73	0	0	0	0	0	0
X74	0	0	0	0	0	0
X75	0	0	0	0	0	0
X76	0	0	NA	NA	NA	NA
X77	0	0	0	NA	NA	NA
X78	0	0	0	0	NA	NA
X79	0	0	NA	NA	NA	NA
X80	0	NA	NA	NA	NA	NA
X81	0	0	0	0	0	NA
X82	0	0	0	0	0	NA
X83	0	0	0	0	0	NA
X84	0	0	0	0	0	NA
X85	0	0	0	0	0	NA
X86	0	0	0	0	0	NA
X87	0	0	0	0	0	NA
X88	0	0	0	0	0	NA
X89	0	0	0	0	NA	NA
X90	0	0	0	0	0	NA
X91	0	0	0	0	0	NA
X92	0	0	0	0	0	NA
X93	0	0	NA	NA	NA	NA
X94	0	0	0	0	0	NA
X95	1	0	0	NA	NA	NA
X96	0	0	NA	NA	NA	NA
X97	NA	NA	NA	NA	NA	NA
X98	0	0	0	0	NA	NA
X99	0	0	0	0	0	NA
X100	0	0	0	0	NA	NA
X101	0	0	0	0	0	NA
X102	0	0	0	0	NA	NA
X103	0	0	0	0	0	NA
X104	0	0	0	NA	NA	NA
X105	0	NA	NA	NA	NA	NA
X106	0	0	0	0	0	NA
X107	0	0	0	0	0	NA
X108	NA	NA	NA	NA	NA	NA
X109	0	0	0	0	0	NA
X110	0	0	0	0	0	NA
X111	0	0	0	0	0	0
X112	NA	NA	NA	NA	NA	NA
X113	0	0	0	0	0	NA
X114	0	0	NA	NA	NA	NA
X115	0	0	0	0	0	NA
X116	0	0	0	NA	NA	NA
X117	0	0	0	0	0	NA
X118	0	0	0	0	0	NA
X119	NA	NA	NA	NA	NA	NA
X120	0	0	0	0	NA	NA
X121	0	0	0	NA	NA	NA
X122	0	0	0	0	0	0
X123	NA	NA	NA	NA	NA	NA
X124	0	0	0	0	0	NA
X125	0	0	0	NA	NA	NA
X126	0	0	0	NA	NA	NA
X127	0	0	0	0	NA	NA
X128	0	0	0	0	0	NA
X129	0	0	0	0	0	NA
X130	0	0	NA	NA	NA	NA
X131	0	0	0	NA	NA	NA
X132	0	0	0	0	0	NA
X133	0	0	0	NA	NA	NA
X134	0	0	NA	NA	NA	NA
X135	NA	NA	NA	NA	NA	NA
X136	0	0	0	NA	NA	NA
X137	0	0	0	0	NA	NA
X138	0	0	0	0	0	NA
X139	0	0	1	0	NA	NA
X140	0	0	NA	NA	NA	NA
X141	0	0	NA	NA	NA	NA
X142	0	0	0	NA	NA	NA
X143	0	0	0	NA	NA	NA
X144	0	0	1	0	0	NA
X145	0	0	0	0	0	NA
X146	NA	NA	NA	NA	NA	NA
X147	0	0	0	0	0	NA
X148	0	0	0	0	0	NA
X149	0	0	0	NA	NA	NA
X150	0	0	0	0	0	NA
X151	NA	NA	NA	NA	NA	NA
X152	NA	NA	NA	NA	NA	NA
X153	NA	NA	NA	NA	NA	NA
X154	NA	NA	NA	NA	NA	NA
X155	0	0	0	0	0	NA
X156	0	0	0	NA	NA	NA
X157	0	0	0	0	NA	NA
X158	NA	NA	NA	NA	NA	NA
X159	0	0	NA	NA	NA	NA
X160	0	0	0	0	0	NA
X161	0	0	0	0	0	NA
X162	0	0	0	1	0	NA
X163	NA	NA	NA	NA	NA	NA
X164	0	0	0	0	0	NA
X165	0	0	0	0	0	NA
X166	0	0	0	NA	NA	NA
X167	NA	NA	NA	NA	NA	NA
X168	0	0	0	NA	NA	NA
X169	0	0	0	NA	NA	NA
X170	0	0	0	0	NA	NA
X171	1	1	0	NA	NA	NA
X172	0	0	0	NA	NA	NA
X173	0	0	0	NA	NA	NA
X174	0	0	0	NA	NA	NA
X175	0	0	0	NA	NA	NA
X176	0	0	0	NA	NA	NA
X177	0	0	0	NA	NA	NA
X178	0	0	0	NA	NA	NA
X179	0	0	0	NA	NA	NA
X180	0	0	0	NA	NA	NA
X181	0	0	0	NA	NA	NA
X182	0	0	0	NA	NA	NA
X183	0	0	0	NA	NA	NA
X184	0	0	0	NA	NA	NA
X185	0	0	0	NA	NA	NA
X186	0	0	0	NA	NA	NA
X187	0	0	0	NA	NA	NA
X188	0	0	0	NA	NA	NA
X189	0	0	0	NA	NA	NA
X190	0	0	0	NA	NA	NA
X191	0	0	1	NA	NA	NA
X192	0	0	0	NA	NA	NA
X193	1	0	1	0	NA	NA
X194	0	0	0	0	0	0
X195	NA	NA	NA	NA	NA	NA
X196	0	0	0	0	0	NA
X197	0	0	0	0	0	0
X198	0	0	0	0	0	0
X199	0	0	0	0	NA	NA
X200	0	0	0	0	0	0
X201	0	0	0	0	0	0
X202	0	0	0	0	0	0
X203	0	NA	NA	NA	NA	NA
X204	0	0	0	0	0	0
X205	0	0	0	0	0	0
X206	0	0	0	0	NA	NA
X207	0	0	0	0	0	0
X208	0	0	0	0	0	0
X209	0	0	0	0	0	0
X210	0	0	0	0	0	0
X211	0	0	0	0	0	0
X212	0	0	0	0	0	0
X213	0	0	0	0	0	0
X214	0	0	0	0	0	0
X215	0	0	0	0	NA	NA
X216	0	0	1	0	0	0
X217	0	1	0	0	0	NA
X218	0	0	0	0	0	0
X219	0	0	0	0	0	0
X220	0	0	0	0	0	0
X221	0	0	0	0	0	0
X222	0	0	0	0	0	0
X223	0	0	0	0	0	0
X224	1	0	0	0	0	0
X225	0	0	0	NA	NA	NA
X226	0	0	0	NA	NA	NA
X227	0	0	0	0	0	0
X228	0	0	0	0	0	NA
X229	0	0	NA	NA	NA	NA
X230	0	0	NA	NA	NA	NA
X231	0	0	0	0	0	0
X232	0	0	0	0	0	0
X233	0	0	0	NA	NA	NA
X234	0	0	0	0	0	NA
X235	0	0	0	0	0	0
X236	0	0	0	0	0	NA
X237	0	0	0	0	0	NA
X238	0	0	0	0	0	NA
X239	0	0	0	0	0	NA
X240	0	1	1	0	0	1
X241	0	0	0	0	0	0
X242	0	0	0	0	0	NA
X243	0	0	0	0	0	0
X244	0	0	0	0	0	NA
X245	0	0	0	0	0	0
X246	0	0	0	0	0	0
X247	0	0	0	0	0	0
X248	0	0	0	0	0	0
X249	0	0	0	0	0	NA
X250	0	0	0	0	0	0
X251	0	0	0	0	0	NA
X252	0	0	1	0	0	0
X253	0	0	1	0	0	0
X254	0	0	0	0	0	0
X255	0	0	NA	NA	NA	NA
X256	0	0	0	0	0	0
X257	0	0	0	0	0	0
X258	0	0	0	0	0	0
X259	0	0	0	NA	NA	NA
X260	0	0	0	0	0	0
X261	0	0	0	0	NA	NA
X262	0	0	0	0	0	0
X263	0	0	0	0	NA	NA
X264	0	0	0	0	0	0
X265	0	0	NA	NA	NA	NA
X266	0	0	0	0	NA	NA
X267	0	0	0	0	0	NA
X268	NA	NA	NA	NA	NA	NA
X269	0	0	0	0	0	NA
X270	0	0	0	0	0	0
X271	0	0	0	0	0	NA
X272	0	0	0	0	0	0
X273	0	0	0	0	0	NA
X274	0	0	0	0	0	0
X275	0	0	0	1	0	NA
X276	0	0	0	0	0	NA
X277	0	0	0	0	0	0
X278	0	0	NA	NA	NA	NA
X279	0	0	0	0	0	NA
X280	0	0	0	0	0	0
X281	0	0	0	0	NA	NA
X282	0	0	NA	NA	NA	NA
X283	0	0	NA	NA	NA	NA
X284	0	0	0	0	0	NA
X285	0	0	0	0	0	NA
X286	0	0	0	0	0	NA
X287	0	0	0	0	0	NA
X288	0	0	0	0	NA	NA
X289	0	0	0	0	0	NA
X290	0	0	0	0	0	0
X291	0	0	0	0	NA	NA
X292	0	0	0	0	0	0
X293	0	0	0	1	0	1
X294	0	0	0	0	0	0
X295	1	0	0	0	0	0
X296	0	0	0	0	0	0
X297	0	0	0	0	0	NA
X298	0	0	0	0	0	NA
X299	1	1	0	0	NA	NA
X300	0	0	0	0	0	0
X301	1	0	0	0	0	0
X302	0	0	NA	NA	NA	NA
X303	0	0	0	NA	NA	NA
X304	1	NA	NA	NA	NA	NA
X305	0	0	0	NA	NA	NA
X306	1	0	1	1	1	0
X307	0	0	0	0	0	0
X308	0	0	0	0	0	0
X309	0	0	0	NA	NA	NA
X310	0	0	0	0	0	NA
X311	1	0	NA	NA	NA	NA
X312	1	1	0	NA	NA	NA
X313	0	0	NA	NA	NA	NA
X314	0	0	NA	NA	NA	NA
X315	0	0	0	NA	NA	NA
X316	0	0	NA	NA	NA	NA
X317	0	0	0	0	0	NA
X318	0	0	0	0	1	1

## Sheet: Snow leopard
	V1	V2	V3	V4	V5	V6
X0	1	1	1	0	NA	NA
X1	0	0	0	0	NA	NA
X2	1	0	0	0	NA	NA
X3	1	1	1	0	0	NA
X4	0	0	0	NA	NA	NA
X5	0	0	0	NA	NA	NA
X6	1	1	1	NA	NA	NA
X7	1	0	0	NA	NA	NA
X8	1	1	1	NA	NA	NA
X9	0	1	0	NA	NA	NA
X10	0	1	1	NA	NA	NA
X11	0	0	1	NA	NA	NA
X12	1	1	0	NA	NA	NA
X13	0	1	0	NA	NA	NA
X14	0	0	0	NA	NA	NA
X15	0	0	0	NA	NA	NA
X16	0	1	0	0	NA	NA
X17	0	0	0	NA	NA	NA
X18	1	1	1	NA	NA	NA
X19	0	0	0	NA	NA	NA
X20	1	1	0	NA	NA	NA
X21	0	0	0	NA	NA	NA
X22	0	0	0	NA	NA	NA
X23	0	1	NA	NA	NA	NA
X24	NA	NA	NA	NA	NA	NA
X25	0	1	0	NA	NA	NA
X26	0	1	0	NA	NA	NA
X27	0	1	NA	NA	NA	NA
X28	0	0	NA	NA	NA	NA
X29	1	0	0	NA	NA	NA
X30	0	0	0	NA	NA	NA
X31	0	0	0	NA	NA	NA
X32	0	1	1	NA	NA	NA
X33	1	0	1	NA	NA	NA
X34	0	0	0	NA	NA	NA
X35	1	1	0	NA	NA	NA
X36	0	0	0	NA	NA	NA
X37	1	1	1	NA	NA	NA
X38	0	1	0	NA	NA	NA
X39	1	1	0	NA	NA	NA
X40	1	1	0	NA	NA	NA
X41	0	0	0	NA	NA	NA
X42	NA	NA	NA	NA	NA	NA
X43	1	0	0	NA	NA	NA
X44	1	NA	NA	NA	NA	NA
X45	0	1	0	NA	NA	NA
X46	0	0	0	NA	NA	NA
X47	0	1	0	NA	NA	NA
X48	1	0	0	NA	NA	NA
X49	1	0	NA	NA	NA	NA
X50	0	0	NA	NA	NA	NA
X51	1	0	NA	NA	NA	NA
X52	0	0	0	NA	NA	NA
X53	0	NA	NA	NA	NA	NA
X54	0	0	0	NA	NA	NA
X55	0	0	0	NA	NA	NA
X56	NA	NA	NA	NA	NA	NA
X57	1	0	NA	NA	NA	NA
X58	NA	NA	NA	NA	NA	NA
X59	0	0	0	NA	NA	NA
X60	0	0	0	NA	NA	NA
X61	NA	NA	NA	NA	NA	NA
X62	0	0	NA	NA	NA	NA
X63	0	0	0	NA	NA	NA
X64	0	0	0	NA	NA	NA
X65	0	0	0	NA	NA	NA
X66	0	1	0	NA	NA	NA
X67	0	0	0	NA	NA	NA
X68	0	0	0	NA	NA	NA
X69	0	0	0	NA	NA	NA
X70	1	0	0	0	0	0
X71	0	0	0	NA	NA	NA
X72	0	0	0	0	0	NA
X73	0	0	0	0	0	0
X74	0	0	0	0	0	0
X75	0	0	0	0	0	0
X76	0	0	NA	NA	NA	NA
X77	0	0	0	NA	NA	NA
X78	0	0	0	0	NA	NA
X79	0	0	NA	NA	NA	NA
X80	0	NA	NA	NA	NA	NA
X81	0	1	0	0	0	NA
X82	0	1	1	1	1	NA
X83	0	0	0	0	0	NA
X84	1	0	0	0	0	NA
X85	0	0	0	0	0	NA
X86	1	1	1	1	0	NA
X87	1	1	1	1	0	NA
X88	1	1	1	0	0	NA
X89	1	1	1	0	NA	NA
X90	1	0	0	1	0	NA
X91	1	1	1	1	0	NA
X92	1	0	0	1	0	NA
X93	0	0	NA	NA	NA	NA
X94	0	0	0	0	0	NA
X95	0	0	0	NA	NA	NA
X96	0	0	NA	NA	NA	NA
X97	NA	NA	NA	NA	NA	NA
X98	0	0	0	0	NA	NA
X99	0	0	0	0	0	NA
X100	0	0	0	0	NA	NA
X101	0	0	0	1	0	NA
X102	0	0	0	0	NA	NA
X103	0	0	0	0	0	NA
X104	0	0	0	NA	NA	NA
X105	0	NA	NA	NA	NA	NA
X106	0	0	0	0	0	NA
X107	0	0	0	0	0	NA
X108	NA	NA	NA	NA	NA	NA
X109	0	0	0	0	0	NA
X110	0	0	0	0	0	NA
X111	0	0	0	0	0	0
X112	NA	NA	NA	NA	NA	NA
X113	0	0	0	0	0	NA
X114	0	0	NA	NA	NA	NA
X115	0	0	0	0	0	NA
X116	0	0	0	NA	NA	NA
X117	0	0	0	0	0	NA
X118	0	0	0	0	0	NA
X119	NA	NA	NA	NA	NA	NA
X120	0	0	0	0	NA	NA
X121	0	0	0	NA	NA	NA
X122	0	0	0	0	0	0
X123	NA	NA	NA	NA	NA	NA
X124	0	0	0	0	0	NA
X125	0	0	0	NA	NA	NA
X126	0	0	0	NA	NA	NA
X127	0	0	0	0	NA	NA
X128	0	0	0	1	0	NA
X129	0	0	0	0	0	NA
X130	0	0	NA	NA	NA	NA
X131	0	0	0	NA	NA	NA
X132	0	0	0	0	0	NA
X133	0	0	1	NA	NA	NA
X134	0	1	NA	NA	NA	NA
X135	NA	NA	NA	NA	NA	NA
X136	0	0	0	NA	NA	NA
X137	0	0	0	0	NA	NA
X138	0	0	0	0	0	NA
X139	0	0	0	0	NA	NA
X140	0	0	NA	NA	NA	NA
X141	0	0	NA	NA	NA	NA
X142	0	1	1	NA	NA	NA
X143	0	0	0	NA	NA	NA
X144	0	0	0	0	0	NA
X145	0	0	0	0	0	NA
X146	NA	NA	NA	NA	NA	NA
X147	0	0	0	0	0	NA
X148	0	0	0	0	0	NA
X149	0	0	0	NA	NA	NA
X150	0	0	0	0	0	NA
X151	NA	NA	NA	NA	NA	NA
X152	NA	NA	NA	NA	NA	NA
X153	NA	NA	NA	NA	NA	NA
X154	NA	NA	NA	NA	NA	NA
X155	0	0	0	1	0	NA
X156	0	0	0	NA	NA	NA
X157	0	0	0	1	NA	NA
X158	NA	NA	NA	NA	NA	NA
X159	0	0	NA	NA	NA	NA
X160	0	0	0	0	0	NA
X161	0	1	1	1	1	NA
X162	0	0	0	0	0	NA
X163	NA	NA	NA	NA	NA	NA
X164	0	0	1	1	0	NA
X165	0	0	0	0	0	NA
X166	0	0	0	NA	NA	NA
X167	NA	NA	NA	NA	NA	NA
X168	0	0	0	NA	NA	NA
X169	0	0	0	NA	NA	NA
X170	0	0	0	0	NA	NA
X171	0	0	0	NA	NA	NA
X172	0	0	1	NA	NA	NA
X173	1	0	0	NA	NA	NA
X174	1	0	0	NA	NA	NA
X175	0	0	0	NA	NA	NA
X176	0	0	0	NA	NA	NA
X177	0	1	0	NA	NA	NA
X178	0	0	0	NA	NA	NA
X179	0	0	0	NA	NA	NA
X180	0	0	0	NA	NA	NA
X181	0	0	1	NA	NA	NA
X182	0	0	0	NA	NA	NA
X183	0	0	0	NA	NA	NA
X184	0	0	0	NA	NA	NA
X185	0	0	0	NA	NA	NA
X186	0	0	0	NA	NA	NA
X187	0	0	0	NA	NA	NA
X188	0	0	0	NA	NA	NA
X189	0	0	0	NA	NA	NA
X190	1	1	1	NA	NA	NA
X191	0	1	1	NA	NA	NA
X192	0	0	0	NA	NA	NA
X193	1	1	0	1	NA	NA
X194	0	0	0	0	0	0
X195	NA	NA	NA	NA	NA	NA
X196	0	0	0	0	0	NA
X197	0	0	0	0	0	1
X198	0	0	0	0	0	0
X199	0	0	0	1	NA	NA
X200	1	0	1	0	0	1
X201	0	0	0	0	0	0
X202	0	0	0	0	0	0
X203	0	NA	NA	NA	NA	NA
X204	0	0	0	0	0	0
X205	0	0	0	0	0	0
X206	0	0	0	0	NA	NA
X207	0	0	0	0	0	0
X208	0	0	0	0	0	0
X209	0	0	0	0	0	0
X210	0	0	0	0	0	0
X211	0	0	0	0	0	0
X212	0	0	0	0	0	0
X213	0	0	0	0	0	0
X214	0	0	0	0	0	0
X215	0	0	0	0	NA	NA
X216	0	0	0	0	0	0
X217	0	0	0	0	0	NA
X218	0	0	0	0	0	0
X219	0	0	0	0	0	0
X220	0	0	0	0	0	0
X221	0	0	0	0	0	0
X222	0	0	0	0	0	0
X223	1	1	1	1	1	1
X224	0	0	1	0	0	1
X225	1	1	1	NA	NA	NA
X226	0	1	0	NA	NA	NA
X227	0	0	0	0	0	0
X228	0	0	0	0	0	NA
X229	1	1	NA	NA	NA	NA
X230	0	0	NA	NA	NA	NA
X231	0	0	0	0	0	0
X232	0	0	0	0	0	0
X233	1	0	0	NA	NA	NA
X234	0	0	0	0	0	NA
X235	0	0	0	0	1	1
X236	0	0	0	0	0	NA
X237	1	0	0	0	0	NA
X238	1	0	0	0	0	NA
X239	0	0	0	0	0	NA
X240	0	0	0	0	0	1
X241	1	1	1	1	1	1
X242	0	0	0	0	0	NA
X243	0	1	0	0	0	1
X244	0	0	1	1	0	NA
X245	0	1	0	0	0	1
X246	1	0	1	0	0	0
X247	1	0	1	0	0	0
X248	0	0	0	0	0	0
X249	0	0	0	0	0	NA
X250	0	0	0	0	0	0
X251	0	0	0	0	0	NA
X252	0	0	0	0	0	0
X253	0	0	0	0	0	0
X254	0	0	0	0	0	0
X255	0	0	NA	NA	NA	NA
X256	1	0	0	0	0	0
X257	1	1	0	1	1	1
X258	0	1	0	1	1	1
X259	1	0	0	NA	NA	NA
X260	1	1	1	1	0	0
X261	1	0	0	0	NA	NA
X262	1	1	1	1	0	0
X263	1	0	1	0	NA	NA
X264	0	1	0	0	0	0
X265	0	1	NA	NA	NA	NA
X266	0	0	0	0	NA	NA
X267	0	0	0	0	0	NA
X268	NA	NA	NA	NA	NA	NA
X269	0	0	0	0	0	NA
X270	1	1	1	0	1	1
X271	0	1	1	0	0	NA
X272	0	0	0	0	1	0
X273	0	1	1	0	0	NA
X274	0	0	0	0	1	0
X275	0	1	1	1	0	NA
X276	0	0	0	0	0	NA
X277	1	1	1	1	1	1
X278	1	1	NA	NA	NA	NA
X279	0	0	0	0	0	NA
X280	0	0	0	0	0	1
X281	0	0	1	0	NA	NA
X282	0	0	NA	NA	NA	NA
X283	0	0	NA	NA	NA	NA
X284	0	0	0	0	0	NA
X285	0	0	0	0	0	NA
X286	0	0	0	0	0	NA
X287	0	0	0	0	0	NA
X288	0	0	0	0	NA	NA
X289	0	0	0	0	0	NA
X290	0	0	0	0	0	0
X291	0	0	0	0	NA	NA
X292	0	0	1	0	0	0
X293	0	0	0	0	0	0
X294	0	0	0	0	0	0
X295	0	0	0	0	0	0
X296	0	0	0	0	0	0
X297	0	0	0	0	0	NA
X298	0	0	0	0	0	NA
X299	0	0	0	0	NA	NA
X300	0	0	0	0	0	0
X301	0	0	0	0	0	0
X302	0	0	NA	NA	NA	NA
X303	0	0	0	NA	NA	NA
X304	0	NA	NA	NA	NA	NA
X305	0	0	0	NA	NA	NA
X306	0	0	0	0	0	0
X307	1	0	1	1	1	1
X308	0	0	0	0	0	0
X309	0	1	0	NA	NA	NA
X310	0	1	1	0	0	NA
X311	1	1	NA	NA	NA	NA
X312	0	1	0	NA	NA	NA
X313	0	0	NA	NA	NA	NA
X314	0	0	NA	NA	NA	NA
X315	1	1	1	NA	NA	NA
X316	0	0	NA	NA	NA	NA
X317	0	0	0	0	0	NA
X318	0	0	0	0	0	0

## Sheet: Eurasian lynx
	V1	V2	V3	V4	V5	V6
X0	0	0	0	0	NA	NA
X1	0	0	0	0	NA	NA
X2	0	1	0	0	NA	NA
X3	0	0	0	0	0	NA
X4	0	0	0	NA	NA	NA
X5	1	1	1	NA	NA	NA
X6	0	1	1	NA	NA	NA
X7	0	0	0	NA	NA	NA
X8	0	1	0	NA	NA	NA
X9	0	0	0	NA	NA	NA
X10	1	0	1	NA	NA	NA
X11	1	1	1	NA	NA	NA
X12	0	0	0	NA	NA	NA
X13	0	0	0	NA	NA	NA
X14	0	0	0	NA	NA	NA
X15	0	0	0	NA	NA	NA
X16	0	0	0	0	NA	NA
X17	1	0	0	NA	NA	NA
X18	1	0	0	NA	NA	NA
X19	1	1	0	NA	NA	NA
X20	0	0	0	NA	NA	NA
X21	0	0	0	NA	NA	NA
X22	0	1	0	NA	NA	NA
X23	0	1	NA	NA	NA	NA
X24	NA	NA	NA	NA	NA	NA
X25	0	0	0	NA	NA	NA
X26	0	0	0	NA	NA	NA
X27	0	0	NA	NA	NA	NA
X28	0	0	NA	NA	NA	NA
X29	0	0	0	NA	NA	NA
X30	0	0	0	NA	NA	NA
X31	0	0	0	NA	NA	NA
X32	0	0	0	NA	NA	NA
X33	0	0	0	NA	NA	NA
X34	0	0	0	NA	NA	NA
X35	0	0	0	NA	NA	NA
X36	0	0	0	NA	NA	NA
X37	0	0	0	NA	NA	NA
X38	0	0	0	NA	NA	NA
X39	0	0	0	NA	NA	NA
X40	0	0	0	NA	NA	NA
X41	0	0	0	NA	NA	NA
X42	NA	NA	NA	NA	NA	NA
X43	0	0	0	NA	NA	NA
X44	0	NA	NA	NA	NA	NA
X45	0	0	0	NA	NA	NA
X46	0	0	0	NA	NA	NA
X47	0	0	0	NA	NA	NA
X48	0	0	0	NA	NA	NA
X49	0	0	NA	NA	NA	NA
X50	1	0	NA	NA	NA	NA
X51	0	0	NA	NA	NA	NA
X52	0	0	0	NA	NA	NA
X53	0	NA	NA	NA	NA	NA
X54	0	0	0	NA	NA	NA
X55	0	0	0	NA	NA	NA
X56	NA	NA	NA	NA	NA	NA
X57	0	0	NA	NA	NA	NA
X58	NA	NA	NA	NA	NA	NA
X59	0	0	0	NA	NA	NA
X60	0	0	0	NA	NA	NA
X61	NA	NA	NA	NA	NA	NA
X62	0	0	NA	NA	NA	NA
X63	0	0	0	NA	NA	NA
X64	0	0	0	NA	NA	NA
X65	0	0	0	NA	NA	NA
X66	0	0	0	NA	NA	NA
X67	0	0	0	NA	NA	NA
X68	0	0	0	NA	NA	NA
X69	0	1	0	NA	NA	NA
X70	0	0	0	0	0	0
X71	0	0	0	NA	NA	NA
X72	0	0	0	0	0	NA
X73	0	0	0	0	0	0
X74	0	0	0	0	0	0
X75	0	0	0	0	0	0
X76	0	0	NA	NA	NA	NA
X77	0	0	0	NA	NA	NA
X78	0	0	0	0	NA	NA
X79	0	0	NA	NA	NA	NA
X80	0	NA	NA	NA	NA	NA
X81	0	0	0	0	0	NA
X82	0	0	0	0	0	NA
X83	0	0	0	0	0	NA
X84	0	0	0	0	0	NA
X85	0	0	0	0	0	NA
X86	0	0	0	0	0	NA
X87	0	0	0	0	0	NA
X88	0	0	0	0	0	NA
X89	0	0	0	0	NA	NA
X90	0	0	0	0	0	NA
X91	0	0	0	0	0	NA
X92	0	0	0	0	0	NA
X93	0	0	NA	NA	NA	NA
X94	0	0	0	0	0	NA
X95	0	0	0	NA	NA	NA
X96	0	0	NA	NA	NA	NA
X97	NA	NA	NA	NA	NA	NA
X98	0	0	0	0	NA	NA
X99	0	0	0	0	0	NA
X100	0	0	0	0	NA	NA
X101	0	0	0	0	0	NA
X102	0	0	0	0	NA	NA
X103	0	0	0	0	0	NA
X104	0	0	0	NA	NA	NA
X105	0	NA	NA	NA	NA	NA
X106	0	0	0	0	0	NA
X107	0	0	0	0	0	NA
X108	NA	NA	NA	NA	NA	NA
X109	0	0	0	0	0	NA
X110	0	0	0	0	0	NA
X111	0	0	0	0	0	0
X112	NA	NA	NA	NA	NA	NA
X113	0	0	0	0	0	NA
X114	0	0	NA	NA	NA	NA
X115	0	0	0	0	0	NA
X116	0	0	0	NA	NA	NA
X117	0	0	0	0	0	NA
X118	0	0	0	0	0	NA
X119	NA	NA	NA	NA	NA	NA
X120	0	0	0	0	NA	NA
X121	0	0	0	NA	NA	NA
X122	0	0	0	0	0	0
X123	NA	NA	NA	NA	NA	NA
X124	0	0	0	0	0	NA
X125	0	0	0	NA	NA	NA
X126	0	0	0	NA	NA	NA
X127	0	0	0	0	NA	NA
X128	1	1	0	0	0	NA
X129	1	1	0	0	0	NA
X130	0	0	NA	NA	NA	NA
X131	0	0	0	NA	NA	NA
X132	0	0	0	0	0	NA
X133	0	1	0	NA	NA	NA
X134	0	1	NA	NA	NA	NA
X135	NA	NA	NA	NA	NA	NA
X136	0	0	0	NA	NA	NA
X137	0	0	0	0	NA	NA
X138	0	0	1	0	0	NA
X139	0	0	0	0	NA	NA
X140	0	1	NA	NA	NA	NA
X141	0	0	NA	NA	NA	NA
X142	0	0	0	NA	NA	NA
X143	1	1	1	NA	NA	NA
X144	0	0	0	0	0	NA
X145	0	0	0	0	0	NA
X146	NA	NA	NA	NA	NA	NA
X147	0	0	0	0	0	NA
X148	0	0	0	0	0	NA
X149	0	0	0	NA	NA	NA
X150	0	0	0	0	0	NA
X151	NA	NA	NA	NA	NA	NA
X152	NA	NA	NA	NA	NA	NA
X153	NA	NA	NA	NA	NA	NA
X154	NA	NA	NA	NA	NA	NA
X155	0	0	0	0	0	NA
X156	0	0	0	NA	NA	NA
X157	0	0	0	0	NA	NA
X158	NA	NA	NA	NA	NA	NA
X159	0	0	NA	NA	NA	NA
X160	0	0	0	0	0	NA
X161	0	0	0	0	0	NA
X162	0	1	1	1	0	NA
X163	NA	NA	NA	NA	NA	NA
X164	1	0	0	1	0	NA
X165	0	0	0	0	0	NA
X166	1	0	0	NA	NA	NA
X167	NA	NA	NA	NA	NA	NA
X168	0	0	0	NA	NA	NA
X169	0	0	0	NA	NA	NA
X170	0	0	0	0	NA	NA
X171	0	0	0	NA	NA	NA
X172	0	0	0	NA	NA	NA
X173	0	0	0	NA	NA	NA
X174	0	0	0	NA	NA	NA
X175	0	0	0	NA	NA	NA
X176	0	0	0	NA	NA	NA
X177	0	0	0	NA	NA	NA
X178	0	0	0	NA	NA	NA
X179	0	0	0	NA	NA	NA
X180	0	0	0	NA	NA	NA
X181	0	0	0	NA	NA	NA
X182	0	0	0	NA	NA	NA
X183	0	0	0	NA	NA	NA
X184	0	0	0	NA	NA	NA
X185	0	0	0	NA	NA	NA
X186	0	0	0	NA	NA	NA
X187	0	1	1	NA	NA	NA
X188	0	0	1	NA	NA	NA
X189	1	0	0	NA	NA	NA
X190	0	0	0	NA	NA	NA
X191	0	0	0	NA	NA	NA
X192	0	0	0	NA	NA	NA
X193	0	0	0	0	NA	NA
X194	0	0	0	0	0	0
X195	NA	NA	NA	NA	NA	NA
X196	0	0	0	0	0	NA
X197	0	0	0	0	0	0
X198	0	0	0	0	0	0
X199	0	0	0	0	NA	NA
X200	0	0	0	0	0	0
X201	0	0	0	0	0	0
X202	0	0	0	0	0	0
X203	0	NA	NA	NA	NA	NA
X204	0	0	0	0	0	0
X205	0	0	0	0	0	0
X206	0	0	0	0	NA	NA
X207	0	0	0	0	0	0
X208	0	0	0	0	0	0
X209	0	0	0	0	0	0
X210	0	0	0	0	0	0
X211	0	0	0	0	0	0
X212	0	0	0	0	0	0
X213	0	0	0	0	0	0
X214	0	0	0	0	0	0
X215	0	0	0	0	NA	NA
X216	0	0	0	0	0	0
X217	0	0	0	0	0	NA
X218	0	0	0	0	0	0
X219	0	0	0	1	0	0
X220	0	0	0	0	0	0
X221	0	0	0	0	0	0
X222	0	0	0	0	0	0
X223	0	0	0	0	0	0
X224	0	0	0	0	0	0
X225	0	0	0	NA	NA	NA
X226	0	0	0	NA	NA	NA
X227	0	0	0	0	0	0
X228	0	0	0	0	0	NA
X229	0	0	NA	NA	NA	NA
X230	0	0	NA	NA	NA	NA
X231	0	0	0	0	0	0
X232	0	0	0	0	0	0
X233	0	0	0	NA	NA	NA
X234	0	0	0	0	0	NA
X235	0	0	0	0	0	0
X236	0	0	0	0	0	NA
X237	0	0	0	0	0	NA
X238	0	0	0	0	0	NA
X239	0	0	0	0	0	NA
X240	0	0	0	0	0	1
X241	0	0	0	0	0	0
X242	0	0	0	0	0	NA
X243	0	0	0	0	0	0
X244	0	0	0	0	0	NA
X245	0	0	0	0	0	0
X246	0	0	0	0	0	0
X247	0	0	0	0	0	0
X248	0	0	0	0	0	0
X249	0	0	0	0	0	NA
X250	0	0	0	0	0	0
X251	0	0	0	0	0	NA
X252	0	0	0	0	0	0
X253	0	0	0	0	0	0
X254	0	0	0	0	0	0
X255	0	0	NA	NA	NA	NA
X256	0	0	0	0	0	0
X257	0	0	0	0	0	0
X258	0	0	0	0	0	0
X259	0	0	0	NA	NA	NA
X260	0	0	0	0	0	0
X261	0	0	0	0	NA	NA
X262	0	0	0	0	0	0
X263	1	0	0	0	NA	NA
X264	0	0	0	0	0	0
X265	0	0	NA	NA	NA	NA
X266	0	0	0	0	NA	NA
X267	0	0	0	0	0	NA
X268	NA	NA	NA	NA	NA	NA
X269	0	0	0	0	0	NA
X270	0	0	0	0	0	0
X271	0	0	0	0	0	NA
X272	0	0	0	0	0	0
X273	0	0	0	0	0	NA
X274	0	0	0	0	0	0
X275	0	0	1	1	0	NA
X276	0	0	0	0	0	NA
X277	0	0	0	0	0	0
X278	0	0	NA	NA	NA	NA
X279	0	0	0	0	0	NA
X280	0	0	0	0	0	0
X281	0	0	0	0	NA	NA
X282	0	0	NA	NA	NA	NA
X283	0	0	NA	NA	NA	NA
X284	0	0	0	0	0	NA
X285	0	0	0	0	0	NA
X286	0	0	0	0	0	NA
X287	0	0	0	0	0	NA
X288	0	0	0	0	NA	NA
X289	0	0	0	0	0	NA
X290	0	0	0	0	0	0
X291	0	0	0	0	NA	NA
X292	0	0	0	0	0	0
X293	0	0	0	0	0	0
X294	0	0	0	0	0	0
X295	0	0	0	0	0	0
X296	0	0	0	0	0	0
X297	0	0	0	0	0	NA
X298	0	0	0	0	0	NA
X299	0	0	0	0	NA	NA
X300	0	0	0	0	0	0
X301	1	1	1	1	0	0
X302	0	0	NA	NA	NA	NA
X303	0	0	1	NA	NA	NA
X304	0	NA	NA	NA	NA	NA
X305	0	0	0	NA	NA	NA
X306	0	0	0	0	0	0
X307	0	0	0	0	0	1
X308	0	0	0	0	0	0
X309	0	0	0	NA	NA	NA
X310	0	0	0	0	0	NA
X311	0	0	NA	NA	NA	NA
X312	0	1	0	NA	NA	NA
X313	1	0	NA	NA	NA	NA
X314	1	0	NA	NA	NA	NA
X315	0	0	0	NA	NA	NA
X316	0	0	NA	NA	NA	NA
X317	0	0	0	0	0	NA
X318	0	0	0	0	0	0

## Sheet: Red fox
	V1	V2	V3	V4	V5	V6
X0	0	0	0	0	NA	NA
X1	0	0	0	0	NA	NA
X2	1	1	1	1	NA	NA
X3	0	1	0	0	0	NA
X4	0	0	0	NA	NA	NA
X5	0	0	0	NA	NA	NA
X6	0	0	0	NA	NA	NA
X7	0	0	0	NA	NA	NA
X8	0	1	1	NA	NA	NA
X9	0	0	1	NA	NA	NA
X10	0	0	0	NA	NA	NA
X11	0	0	0	NA	NA	NA
X12	0	0	0	NA	NA	NA
X13	0	0	0	NA	NA	NA
X14	0	0	0	NA	NA	NA
X15	0	0	0	NA	NA	NA
X16	0	0	0	0	NA	NA
X17	0	0	0	NA	NA	NA
X18	0	0	0	NA	NA	NA
X19	0	0	0	NA	NA	NA
X20	0	0	0	NA	NA	NA
X21	0	0	0	NA	NA	NA
X22	0	0	0	NA	NA	NA
X23	0	1	NA	NA	NA	NA
X24	NA	NA	NA	NA	NA	NA
X25	0	0	0	NA	NA	NA
X26	0	0	0	NA	NA	NA
X27	0	0	NA	NA	NA	NA
X28	0	0	NA	NA	NA	NA
X29	0	0	0	NA	NA	NA
X30	0	0	0	NA	NA	NA
X31	1	1	1	NA	NA	NA
X32	0	0	0	NA	NA	NA
X33	0	0	0	NA	NA	NA
X34	0	0	0	NA	NA	NA
X35	0	0	0	NA	NA	NA
X36	0	0	0	NA	NA	NA
X37	0	0	0	NA	NA	NA
X38	0	0	0	NA	NA	NA
X39	0	0	0	NA	NA	NA
X40	0	0	0	NA	NA	NA
X41	1	1	0	NA	NA	NA
X42	NA	NA	NA	NA	NA	NA
X43	0	0	0	NA	NA	NA
X44	0	NA	NA	NA	NA	NA
X45	0	0	0	NA	NA	NA
X46	0	1	0	NA	NA	NA
X47	0	0	0	NA	NA	NA
X48	0	0	0	NA	NA	NA
X49	1	1	NA	NA	NA	NA
X50	0	0	NA	NA	NA	NA
X51	0	1	NA	NA	NA	NA
X52	0	0	0	NA	NA	NA
X53	0	NA	NA	NA	NA	NA
X54	0	0	0	NA	NA	NA
X55	0	0	0	NA	NA	NA
X56	NA	NA	NA	NA	NA	NA
X57	1	0	NA	NA	NA	NA
X58	NA	NA	NA	NA	NA	NA
X59	0	0	0	NA	NA	NA
X60	0	0	0	NA	NA	NA
X61	NA	NA	NA	NA	NA	NA
X62	0	0	NA	NA	NA	NA
X63	0	0	0	NA	NA	NA
X64	0	0	0	NA	NA	NA
X65	0	0	0	NA	NA	NA
X66	0	0	0	NA	NA	NA
X67	0	0	0	NA	NA	NA
X68	0	0	0	NA	NA	NA
X69	0	0	0	NA	NA	NA
X70	0	0	0	0	0	0
X71	1	0	1	NA	NA	NA
X72	0	0	0	0	0	NA
X73	0	0	0	0	0	0
X74	1	0	0	0	0	0
X75	0	0	0	0	0	0
X76	0	0	NA	NA	NA	NA
X77	0	1	0	NA	NA	NA
X78	0	0	0	0	NA	NA
X79	0	1	NA	NA	NA	NA
X80	0	NA	NA	NA	NA	NA
X81	0	0	0	0	0	NA
X82	0	0	0	0	0	NA
X83	0	0	0	0	0	NA
X84	0	0	0	0	0	NA
X85	0	0	0	0	0	NA
X86	0	0	0	0	0	NA
X87	0	0	1	0	0	NA
X88	0	0	0	0	0	NA
X89	0	0	0	0	NA	NA
X90	0	0	0	0	0	NA
X91	0	0	0	0	0	NA
X92	0	0	0	0	0	NA
X93	0	0	NA	NA	NA	NA
X94	0	0	0	0	0	NA
X95	1	1	0	NA	NA	NA
X96	0	0	NA	NA	NA	NA
X97	NA	NA	NA	NA	NA	NA
X98	0	0	0	0	NA	NA
X99	0	0	0	0	0	NA
X100	0	0	0	0	NA	NA
X101	0	0	0	0	0	NA
X102	0	0	0	0	NA	NA
X103	0	0	0	0	0	NA
X104	0	1	0	NA	NA	NA
X105	0	NA	NA	NA	NA	NA
X106	1	0	1	1	1	NA
X107	0	0	0	0	0	NA
X108	NA	NA	NA	NA	NA	NA
X109	1	1	1	1	0	NA
X110	0	0	0	0	0	NA
X111	0	0	0	0	0	0
X112	NA	NA	NA	NA	NA	NA
X113	0	0	0	0	0	NA
X114	0	0	NA	NA	NA	NA
X115	0	0	0	0	0	NA
X116	0	0	0	NA	NA	NA
X117	0	0	0	0	0	NA
X118	0	0	0	0	0	NA
X119	NA	NA	NA	NA	NA	NA
X120	0	0	0	0	NA	NA
X121	0	0	0	NA	NA	NA
X122	0	0	0	0	0	0
X123	NA	NA	NA	NA	NA	NA
X124	0	0	0	0	0	NA
X125	0	0	0	NA	NA	NA
X126	0	0	0	NA	NA	NA
X127	0	0	0	0	NA	NA
X128	0	0	0	0	0	NA
X129	0	0	0	0	0	NA
X130	0	0	NA	NA	NA	NA
X131	0	0	0	NA	NA	NA
X132	0	0	0	0	0	NA
X133	0	0	0	NA	NA	NA
X134	0	0	NA	NA	NA	NA
X135	NA	NA	NA	NA	NA	NA
X136	0	0	0	NA	NA	NA
X137	0	0	0	0	NA	NA
X138	0	0	0	1	0	NA
X139	0	1	0	0	NA	NA
X140	0	0	NA	NA	NA	NA
X141	0	0	NA	NA	NA	NA
X142	0	0	0	NA	NA	NA
X143	0	0	0	NA	NA	NA
X144	0	0	0	0	0	NA
X145	0	0	0	0	0	NA
X146	NA	NA	NA	NA	NA	NA
X147	0	0	0	0	0	NA
X148	0	0	0	0	0	NA
X149	0	0	0	NA	NA	NA
X150	0	0	0	0	0	NA
X151	NA	NA	NA	NA	NA	NA
X152	NA	NA	NA	NA	NA	NA
X153	NA	NA	NA	NA	NA	NA
X154	NA	NA	NA	NA	NA	NA
X155	1	0	0	0	0	NA
X156	0	0	0	NA	NA	NA
X157	0	0	0	0	NA	NA
X158	NA	NA	NA	NA	NA	NA
X159	0	0	NA	NA	NA	NA
X160	0	0	0	0	0	NA
X161	0	0	0	0	0	NA
X162	0	0	0	0	0	NA
X163	NA	NA	NA	NA	NA	NA
X164	0	0	0	0	0	NA
X165	0	0	0	0	0	NA
X166	0	0	0	NA	NA	NA
X167	NA	NA	NA	NA	NA	NA
X168	0	0	0	NA	NA	NA
X169	0	0	0	NA	NA	NA
X170	0	0	0	0	NA	NA
X171	0	0	0	NA	NA	NA
X172	1	1	1	NA	NA	NA
X173	0	0	0	NA	NA	NA
X174	0	0	0	NA	NA	NA
X175	0	0	0	NA	NA	NA
X176	0	0	0	NA	NA	NA
X177	1	1	0	NA	NA	NA
X178	0	0	0	NA	NA	NA
X179	0	0	0	NA	NA	NA
X180	0	0	0	NA	NA	NA
X181	0	0	0	NA	NA	NA
X182	0	0	0	NA	NA	NA
X183	0	0	0	NA	NA	NA
X184	0	0	0	NA	NA	NA
X185	0	0	0	NA	NA	NA
X186	0	0	0	NA	NA	NA
X187	0	0	0	NA	NA	NA
X188	0	0	0	NA	NA	NA
X189	0	0	0	NA	NA	NA
X190	1	0	0	NA	NA	NA
X191	0	0	1	NA	NA	NA
X192	0	0	0	NA	NA	NA
X193	1	1	1	1	NA	NA
X194	0	0	0	0	0	0
X195	NA	NA	NA	NA	NA	NA
X196	1	1	1	0	0	NA
X197	0	0	0	0	0	0
X198	0	0	0	0	0	1
X199	0	1	1	1	NA	NA
X200	0	0	1	0	0	0
X201	0	0	0	0	0	0
X202	0	0	0	0	0	0
X203	1	NA	NA	NA	NA	NA
X204	1	0	1	0	1	1
X205	0	0	0	0	0	0
X206	0	0	0	0	NA	NA
X207	0	0	0	0	0	0
X208	0	0	0	0	0	0
X209	0	1	1	0	0	1
X210	1	1	1	1	0	0
X211	0	1	1	0	1	1
X212	1	1	1	1	0	1
X213	0	0	1	0	1	0
X214	0	0	0	0	0	0
X215	1	0	0	1	NA	NA
X216	1	0	0	1	1	0
X217	0	0	0	0	0	NA
X218	0	0	1	0	0	0
X219	0	0	0	1	0	0
X220	0	0	0	0	0	0
X221	1	0	0	0	0	1
X222	0	0	0	0	0	0
X223	0	0	0	0	0	1
X224	0	0	0	0	0	0
X225	0	0	0	NA	NA	NA
X226	0	0	0	NA	NA	NA
X227	0	0	0	0	1	0
X228	0	0	0	0	0	NA
X229	0	1	NA	NA	NA	NA
X230	0	0	NA	NA	NA	NA
X231	0	0	0	0	0	0
X232	0	0	0	0	0	0
X233	1	0	0	NA	NA	NA
X234	1	0	0	0	0	NA
X235	0	0	0	0	0	0
X236	0	0	0	0	0	NA
X237	0	0	0	0	0	NA
X238	0	0	0	0	0	NA
X239	0	0	0	0	0	NA
X240	1	1	1	0	0	1
X241	0	0	0	0	0	1
X242	0	0	0	0	0	NA
X243	0	0	0	0	0	0
X244	0	0	0	0	0	NA
X245	0	0	0	0	0	0
X246	0	0	0	0	0	0
X247	0	1	0	0	0	0
X248	0	0	0	0	0	0
X249	0	0	0	0	0	NA
X250	0	0	0	0	0	0
X251	1	1	0	0	0	NA
X252	1	1	0	1	1	0
X253	1	1	0	1	0	0
X254	1	0	0	0	1	0
X255	0	1	NA	NA	NA	NA
X256	1	0	1	0	1	0
X257	0	0	0	0	0	0
X258	1	0	0	1	0	0
X259	1	0	0	NA	NA	NA
X260	0	0	0	0	0	0
X261	0	0	0	0	NA	NA
X262	0	0	0	0	0	0
X263	0	0	0	0	NA	NA
X264	0	1	0	0	0	0
X265	0	1	NA	NA	NA	NA
X266	0	0	0	0	NA	NA
X267	0	0	0	0	0	NA
X268	NA	NA	NA	NA	NA	NA
X269	0	0	0	0	0	NA
X270	0	1	0	0	0	1
X271	0	0	1	0	0	NA
X272	1	0	1	0	1	0
X273	0	0	1	0	1	NA
X274	0	0	1	0	1	0
X275	1	1	1	1	0	NA
X276	0	0	0	0	0	NA
X277	0	0	0	0	1	0
X278	0	0	NA	NA	NA	NA
X279	0	1	0	0	0	NA
X280	0	0	0	1	1	1
X281	0	0	0	0	NA	NA
X282	0	0	NA	NA	NA	NA
X283	0	0	NA	NA	NA	NA
X284	1	0	0	0	0	NA
X285	0	0	0	0	0	NA
X286	0	0	1	1	0	NA
X287	0	0	1	0	0	NA
X288	0	0	1	0	NA	NA
X289	0	1	1	0	0	NA
X290	1	0	1	0	0	0
X291	1	0	1	0	NA	NA
X292	0	0	0	0	0	0
X293	1	0	1	0	1	1
X294	0	0	0	0	0	0
X295	0	0	0	0	0	0
X296	0	1	1	0	0	0
X297	0	0	0	0	0	NA
X298	0	0	0	0	0	NA
X299	0	1	0	0	NA	NA
X300	0	0	0	0	0	0
X301	0	0	0	0	0	0
X302	0	0	NA	NA	NA	NA
X303	0	0	0	NA	NA	NA
X304	0	NA	NA	NA	NA	NA
X305	0	0	1	NA	NA	NA
X306	1	1	0	0	0	0
X307	1	1	1	1	1	1
X308	0	0	0	0	0	0
X309	1	1	0	NA	NA	NA
X310	1	1	1	1	1	NA
X311	0	1	NA	NA	NA	NA
X312	0	1	1	NA	NA	NA
X313	0	1	NA	NA	NA	NA
X314	0	0	NA	NA	NA	NA
X315	1	1	1	NA	NA	NA
X316	0	1	NA	NA	NA	NA
X317	0	0	0	0	0	NA
X318	1	1	1	1	1	1

## Sheet: Tibetan fox
	V1	V2	V3	V4	V5	V6
X0	0	0	0	0	NA	NA
X1	0	0	0	0	NA	NA
X2	0	0	0	0	NA	NA
X3	0	0	0	0	0	NA
X4	0	0	0	NA	NA	NA
X5	0	0	0	NA	NA	NA
X6	0	0	0	NA	NA	NA
X7	0	1	0	NA	NA	NA
X8	0	0	0	NA	NA	NA
X9	0	0	0	NA	NA	NA
X10	0	0	0	NA	NA	NA
X11	0	0	0	NA	NA	NA
X12	0	0	0	NA	NA	NA
X13	0	0	0	NA	NA	NA
X14	0	0	0	NA	NA	NA
X15	0	0	0	NA	NA	NA
X16	0	0	0	0	NA	NA
X17	0	0	0	NA	NA	NA
X18	0	0	0	NA	NA	NA
X19	0	0	0	NA	NA	NA
X20	0	0	0	NA	NA	NA
X21	0	0	0	NA	NA	NA
X22	0	0	0	NA	NA	NA
X23	0	0	NA	NA	NA	NA
X24	NA	NA	NA	NA	NA	NA
X25	0	0	0	NA	NA	NA
X26	0	0	0	NA	NA	NA
X27	0	0	NA	NA	NA	NA
X28	0	0	NA	NA	NA	NA
X29	1	0	1	NA	NA	NA
X30	1	0	0	NA	NA	NA
X31	0	0	0	NA	NA	NA
X32	0	0	0	NA	NA	NA
X33	0	0	0	NA	NA	NA
X34	0	0	0	NA	NA	NA
X35	0	0	0	NA	NA	NA
X36	0	0	0	NA	NA	NA
X37	0	0	0	NA	NA	NA
X38	0	0	0	NA	NA	NA
X39	0	0	0	NA	NA	NA
X40	0	0	0	NA	NA	NA
X41	1	0	0	NA	NA	NA
X42	NA	NA	NA	NA	NA	NA
X43	0	0	0	NA	NA	NA
X44	0	NA	NA	NA	NA	NA
X45	0	0	0	NA	NA	NA
X46	0	0	0	NA	NA	NA
X47	0	0	0	NA	NA	NA
X48	0	0	0	NA	NA	NA
X49	0	0	NA	NA	NA	NA
X50	0	0	NA	NA	NA	NA
X51	0	0	NA	NA	NA	NA
X52	0	0	0	NA	NA	NA
X53	0	NA	NA	NA	NA	NA
X54	0	0	0	NA	NA	NA
X55	0	0	0	NA	NA	NA
X56	NA	NA	NA	NA	NA	NA
X57	0	0	NA	NA	NA	NA
X58	NA	NA	NA	NA	NA	NA
X59	0	0	0	NA	NA	NA
X60	0	0	0	NA	NA	NA
X61	NA	NA	NA	NA	NA	NA
X62	0	0	NA	NA	NA	NA
X63	0	0	0	NA	NA	NA
X64	0	0	0	NA	NA	NA
X65	0	0	0	NA	NA	NA
X66	0	0	0	NA	NA	NA
X67	0	0	0	NA	NA	NA
X68	0	0	0	NA	NA	NA
X69	0	0	0	NA	NA	NA
X70	0	0	0	0	0	0
X71	0	0	0	NA	NA	NA
X72	0	0	0	0	0	NA
X73	0	0	0	0	0	0
X74	0	0	0	0	0	0
X75	0	0	0	0	0	0
X76	0	0	NA	NA	NA	NA
X77	0	0	0	NA	NA	NA
X78	0	0	0	0	NA	NA
X79	0	0	NA	NA	NA	NA
X80	0	NA	NA	NA	NA	NA
X81	0	0	0	0	0	NA
X82	0	0	0	0	0	NA
X83	0	0	0	0	0	NA
X84	0	0	0	0	0	NA
X85	0	0	0	0	0	NA
X86	0	0	0	0	0	NA
X87	0	0	0	0	0	NA
X88	0	0	0	0	0	NA
X89	0	0	0	0	NA	NA
X90	0	0	0	0	0	NA
X91	0	0	0	0	0	NA
X92	0	0	0	0	0	NA
X93	0	0	NA	NA	NA	NA
X94	0	0	0	0	0	NA
X95	0	0	0	NA	NA	NA
X96	0	0	NA	NA	NA	NA
X97	NA	NA	NA	NA	NA	NA
X98	0	0	0	0	NA	NA
X99	0	0	0	0	0	NA
X100	0	0	0	0	NA	NA
X101	0	0	0	0	0	NA
X102	0	0	0	0	NA	NA
X103	0	0	0	0	0	NA
X104	0	0	0	NA	NA	NA
X105	0	NA	NA	NA	NA	NA
X106	0	0	0	0	0	NA
X107	0	0	0	0	0	NA
X108	NA	NA	NA	NA	NA	NA
X109	0	0	0	0	0	NA
X110	0	0	0	0	1	NA
X111	0	0	0	0	0	0
X112	NA	NA	NA	NA	NA	NA
X113	0	0	0	0	0	NA
X114	0	0	NA	NA	NA	NA
X115	0	0	0	0	0	NA
X116	0	0	0	NA	NA	NA
X117	0	0	0	0	0	NA
X118	0	0	0	0	0	NA
X119	NA	NA	NA	NA	NA	NA
X120	0	0	0	0	NA	NA
X121	0	0	0	NA	NA	NA
X122	0	0	0	0	0	0
X123	NA	NA	NA	NA	NA	NA
X124	0	0	0	0	0	NA
X125	0	0	0	NA	NA	NA
X126	0	0	0	NA	NA	NA
X127	0	0	0	0	NA	NA
X128	0	0	0	0	0	NA
X129	0	0	0	0	0	NA
X130	0	0	NA	NA	NA	NA
X131	0	0	0	NA	NA	NA
X132	0	0	0	0	0	NA
X133	0	0	0	NA	NA	NA
X134	0	0	NA	NA	NA	NA
X135	NA	NA	NA	NA	NA	NA
X136	0	0	0	NA	NA	NA
X137	0	0	0	0	NA	NA
X138	0	0	0	0	0	NA
X139	0	0	0	0	NA	NA
X140	0	0	NA	NA	NA	NA
X141	0	0	NA	NA	NA	NA
X142	0	0	0	NA	NA	NA
X143	0	0	0	NA	NA	NA
X144	0	0	1	0	0	NA
X145	0	0	0	0	0	NA
X146	NA	NA	NA	NA	NA	NA
X147	0	0	0	0	0	NA
X148	0	0	0	0	0	NA
X149	0	0	0	NA	NA	NA
X150	0	0	0	0	0	NA
X151	NA	NA	NA	NA	NA	NA
X152	NA	NA	NA	NA	NA	NA
X153	NA	NA	NA	NA	NA	NA
X154	NA	NA	NA	NA	NA	NA
X155	0	0	0	0	0	NA
X156	0	0	0	NA	NA	NA
X157	0	0	0	0	NA	NA
X158	NA	NA	NA	NA	NA	NA
X159	0	0	NA	NA	NA	NA
X160	0	0	0	0	0	NA
X161	0	0	0	0	0	NA
X162	0	0	0	0	0	NA
X163	NA	NA	NA	NA	NA	NA
X164	0	0	0	0	0	NA
X165	0	0	0	0	0	NA
X166	0	0	0	NA	NA	NA
X167	NA	NA	NA	NA	NA	NA
X168	0	0	0	NA	NA	NA
X169	0	0	0	NA	NA	NA
X170	0	0	0	0	NA	NA
X171	0	0	0	NA	NA	NA
X172	0	0	0	NA	NA	NA
X173	0	0	0	NA	NA	NA
X174	0	0	0	NA	NA	NA
X175	0	0	0	NA	NA	NA
X176	0	0	0	NA	NA	NA
X177	0	0	0	NA	NA	NA
X178	0	0	0	NA	NA	NA
X179	0	0	0	NA	NA	NA
X180	0	0	0	NA	NA	NA
X181	0	0	0	NA	NA	NA
X182	0	0	0	NA	NA	NA
X183	0	0	0	NA	NA	NA
X184	0	0	0	NA	NA	NA
X185	0	0	0	NA	NA	NA
X186	0	0	0	NA	NA	NA
X187	0	0	0	NA	NA	NA
X188	0	0	0	NA	NA	NA
X189	0	0	0	NA	NA	NA
X190	0	0	0	NA	NA	NA
X191	0	0	0	NA	NA	NA
X192	0	0	0	NA	NA	NA
X193	1	1	1	1	NA	NA
X194	1	1	1	1	0	1
X195	NA	NA	NA	NA	NA	NA
X196	0	0	0	0	0	NA
X197	0	0	0	0	0	0
X198	0	0	0	0	0	0
X199	0	0	0	0	NA	NA
X200	0	0	0	0	0	0
X201	0	0	0	0	0	0
X202	0	0	0	0	0	0
X203	0	NA	NA	NA	NA	NA
X204	0	0	0	0	0	0
X205	0	0	0	0	0	0
X206	0	0	0	0	NA	NA
X207	0	0	0	0	0	0
X208	0	0	0	0	0	0
X209	0	0	0	0	0	0
X210	0	0	0	0	0	0
X211	0	0	0	0	0	0
X212	0	0	0	0	0	0
X213	0	0	0	0	0	0
X214	0	0	0	0	0	0
X215	0	0	0	0	NA	NA
X216	0	0	0	0	0	0
X217	0	0	0	0	0	NA
X218	0	0	0	0	0	0
X219	0	0	0	0	0	0
X220	0	0	0	0	0	0
X221	0	0	0	0	0	0
X222	0	0	0	0	0	0
X223	0	0	0	0	0	0
X224	0	0	0	1	0	1
X225	0	0	0	NA	NA	NA
X226	0	0	0	NA	NA	NA
X227	0	0	0	0	0	0
X228	0	0	0	0	0	NA
X229	0	0	NA	NA	NA	NA
X230	0	0	NA	NA	NA	NA
X231	0	0	0	0	0	0
X232	0	0	0	0	0	0
X233	0	0	0	NA	NA	NA
X234	0	0	0	0	0	NA
X235	0	0	0	0	0	0
X236	0	0	0	0	0	NA
X237	0	0	0	0	0	NA
X238	0	0	0	0	0	NA
X239	0	0	0	0	0	NA
X240	1	1	1	0	0	1
X241	0	0	0	0	0	0
X242	0	0	0	0	0	NA
X243	0	0	0	0	0	0
X244	0	0	0	0	0	NA
X245	0	0	0	0	0	0
X246	0	0	0	0	0	0
X247	0	0	0	0	0	0
X248	0	0	0	0	0	0
X249	0	0	0	0	0	NA
X250	0	0	0	0	0	0
X251	0	0	0	0	0	NA
X252	0	0	0	0	0	0
X253	0	0	0	0	0	0
X254	0	0	0	0	0	0
X255	0	0	NA	NA	NA	NA
X256	0	0	0	0	0	0
X257	0	0	0	0	0	0
X258	0	0	0	0	0	0
X259	0	0	0	NA	NA	NA
X260	0	0	0	0	0	0
X261	0	0	0	0	NA	NA
X262	0	0	0	0	0	0
X263	0	0	0	0	NA	NA
X264	0	0	0	0	0	0
X265	0	0	NA	NA	NA	NA
X266	0	0	0	0	NA	NA
X267	0	0	0	0	0	NA
X268	NA	NA	NA	NA	NA	NA
X269	0	0	0	0	0	NA
X270	0	0	0	0	0	0
X271	1	0	0	0	0	NA
X272	0	0	0	0	0	0
X273	1	0	0	0	0	NA
X274	0	0	0	0	0	0
X275	1	1	1	1	0	NA
X276	0	0	0	0	0	NA
X277	0	0	0	0	0	0
X278	0	0	NA	NA	NA	NA
X279	0	0	0	0	0	NA
X280	0	0	0	0	0	0
X281	0	0	0	0	NA	NA
X282	0	0	NA	NA	NA	NA
X283	0	0	NA	NA	NA	NA
X284	0	0	0	0	0	NA
X285	0	0	0	0	0	NA
X286	0	0	0	0	0	NA
X287	1	0	0	0	0	NA
X288	0	0	0	0	NA	NA
X289	0	0	0	0	0	NA
X290	0	0	0	0	0	0
X291	0	0	0	0	NA	NA
X292	0	0	0	0	0	0
X293	0	0	0	0	0	1
X294	0	1	1	1	0	1
X295	1	1	0	1	1	1
X296	1	1	0	0	1	1
X297	0	0	0	0	0	NA
X298	1	1	1	1	0	NA
X299	1	1	0	0	NA	NA
X300	0	0	0	0	0	0
X301	0	0	0	0	0	0
X302	1	0	NA	NA	NA	NA
X303	0	0	1	NA	NA	NA
X304	1	NA	NA	NA	NA	NA
X305	1	1	1	NA	NA	NA
X306	1	1	1	1	1	0
X307	0	1	0	0	0	1
X308	0	0	0	0	0	1
X309	1	0	0	NA	NA	NA
X310	0	0	0	0	0	NA
X311	0	1	NA	NA	NA	NA
X312	1	0	0	NA	NA	NA
X313	0	0	NA	NA	NA	NA
X314	0	0	NA	NA	NA	NA
X315	0	1	0	NA	NA	NA
X316	1	1	NA	NA	NA	NA
X317	1	0	0	0	0	NA
X318	1	1	1	1	1	1
